# Supplementary material for: Wire Electrochemical Etching of Superhydrophobic Nickel Surfaces with Enhanced Corrosion Protection
Source: MDPI journal article supplement (doi:10.3390/ma16237472), 2023-12-01
Supplement: s1 [file s1]

# Wire Electrochemical Etching of Superhydrophobic Nickel Surfaces with Enhanced Corrosion Protection

Binghan Wu <sup>1,†</sup>, Defeng Yan <sup>1,†</sup>, Junyi Lin <sup>1</sup> and Jinlong Song <sup>1,2,\*</sup>

<sup>1</sup> State Key Laboratory of High-Performance Precision Manufacturing, Dalian University of Technology, Dalian 116024, China; wubinghan@mail.dlut.edu.cn (B.W.); yandefeng1994@163.com (D.Y.); linjy1372@163.com (J.L.)

<sup>2</sup> Key Laboratory for Micro/Nano Technology and System of Liaoning Province, Dalian University of Technology, Dalian 116024, China

\* Correspondence: songjinlong@dlut.edu.cn

† These authors contributed equally to this work.

## Figures

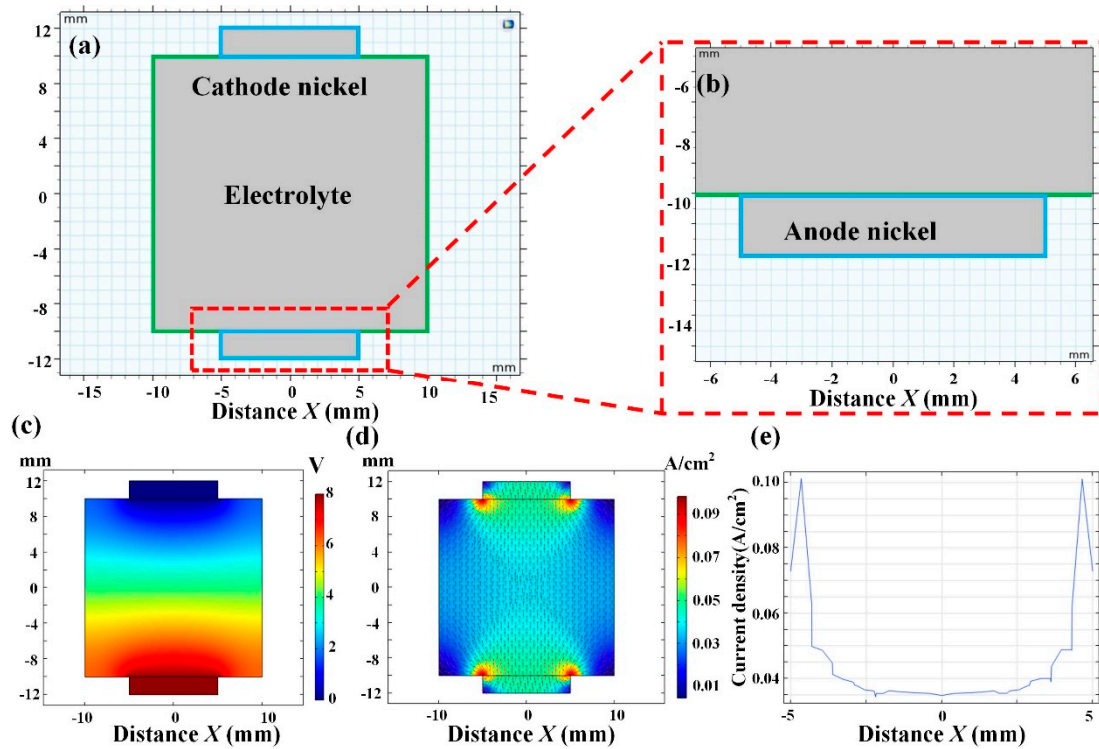

**Figure S1.** Plate electrochemical etching simulation. (a) Model for plate electrochemical etching. (b) Local magnification for plate electrochemical etching. (c) Voltage for plate electrochemical etching. (d) Current density for plate electrochemical etching. (e) Current density data on the surface of anode nickel plate.

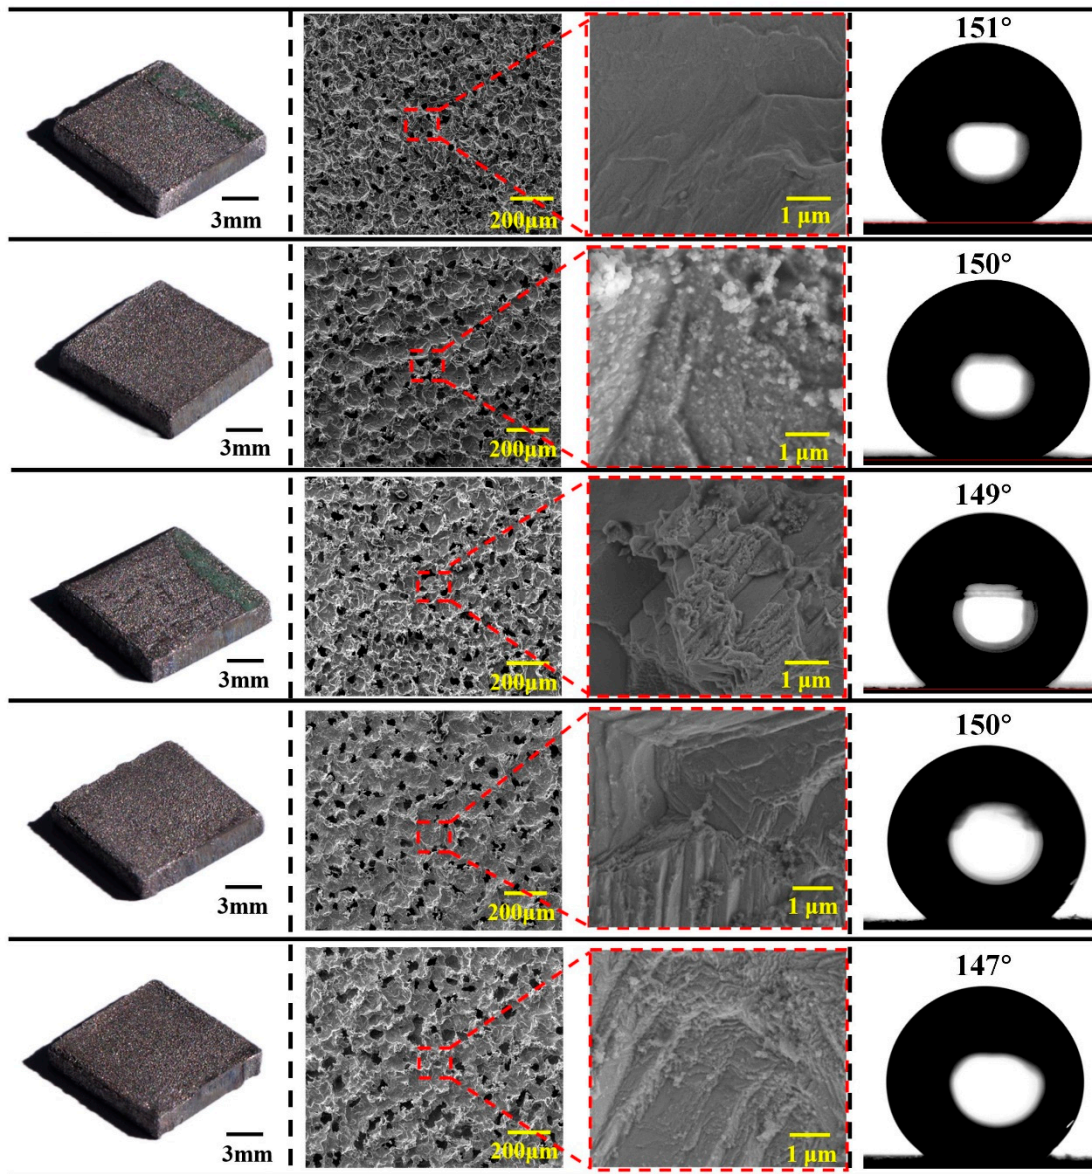

**Figure S2.** Effect of electrolyte concentration on fabricating superhydrophobic surface. Macroscopic, SEM, and contact angle measurements after etching at 15 g/L, 20 g/L, 25 g/L, 30 g/L, and 35 g/L electrolyte concentration at 30  $\mu\text{m/s}$  feed rate and 8 V voltage.

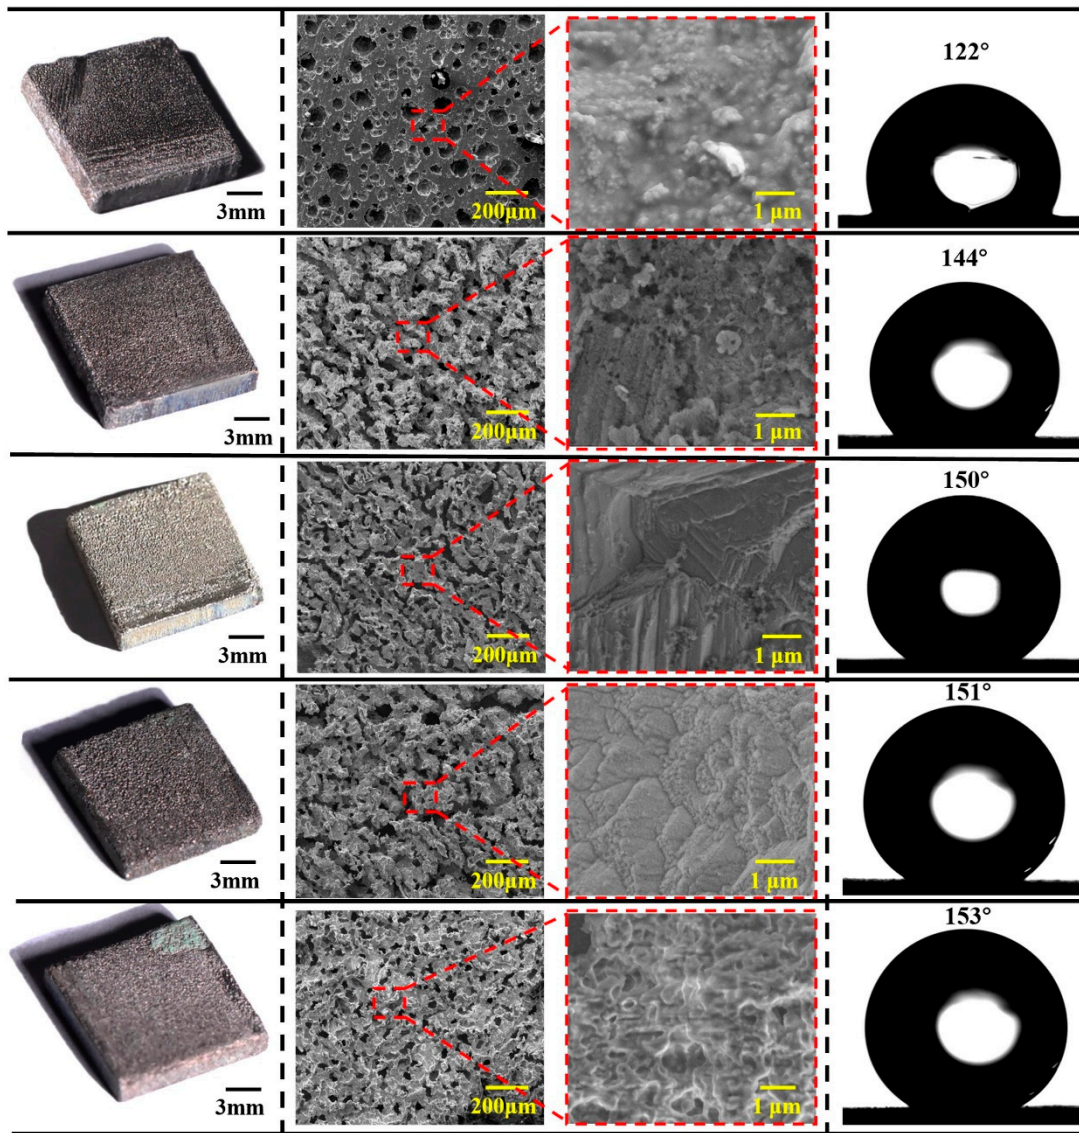

**Figure S3.** Effect of voltage on fabricating superhydrophobic surface. Macroscopic, SEM, and contact angle measurements after etching at 4 V, 6 V, 8 V, 10 V, and 12 V voltage at 30 g/L electrolyte concentration and 30  $\mu\text{m/s}$  feed rate.

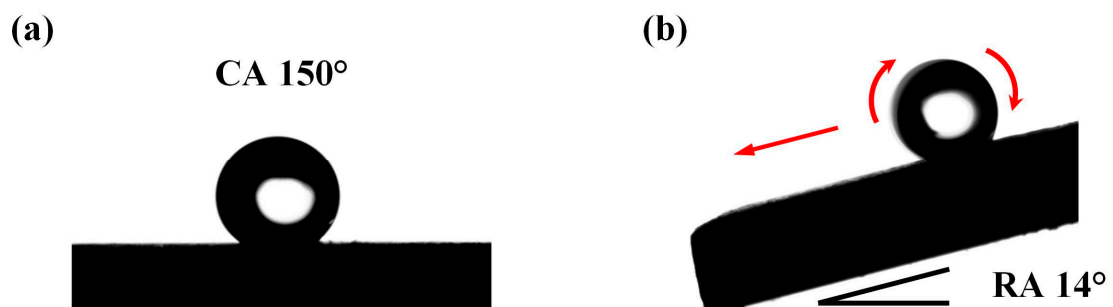

**Figure S4.** Characterization of superhydrophobic nickel surface after antifouling test.(a) Measurement of contact angle.(b) Measurement of rolling angle.



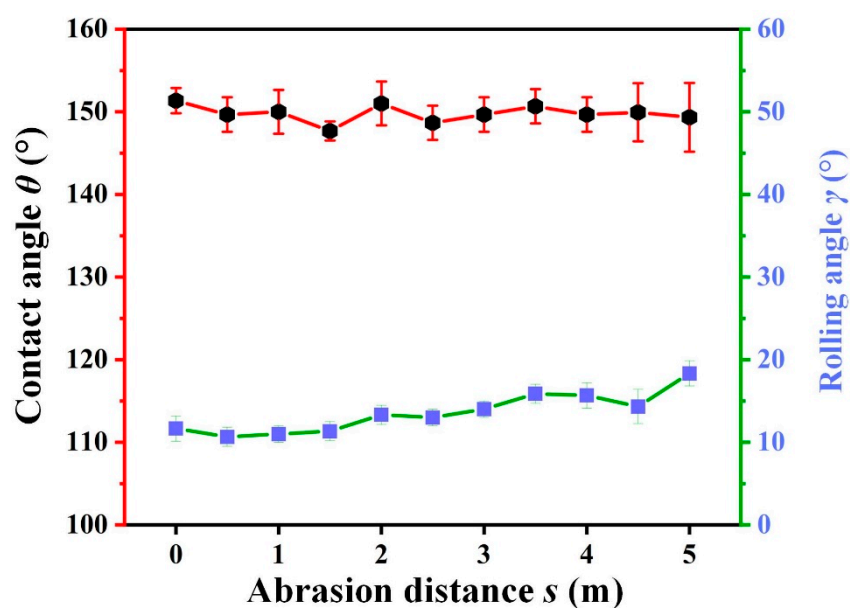

**Figure S5.** Abrasion resistance test data plot on the 240 # sandpaper.

## Tables

**Table S1.** The fitting values for the electrochemical impedance spectroscopy simulation

| Samples          | $R_s$ [error(%)] | CPE( $\mu$ F) [error(%)] | $R_{ct}(\Omega)$ [error(%)] |
|------------------|------------------|--------------------------|-----------------------------|
| Superhydrophobic | 2.77(5.91)       | 109.1(2.08)              | 18952(7.72)                 |
| Bare             | 2.70(4.70)       | 145.0(2.52)              | 13069(8.99)                 |

**Table S2.** The fitting values for the electrochemical impedance spectroscopy simulation

| Samples          | $\beta_a$ (V/dec) | $-\beta_c$ (V/dec) | Corrosion rate (mm/a) | corrosion current density(A/cm <sup>2</sup> ) |
|------------------|-------------------|--------------------|-----------------------|-----------------------------------------------|
| Superhydrophobic | 86                | -115               | 0.024                 | $9.77 \times 10^{-6}$                         |
| Bare             | 148               | -75                | 0.051                 | $3.23 \times 10^{-5}$                         |
